# Supplementary material
Source: PubMed Central journal article supplement (PMC2681421)
Supplement: supp_01138.2007_Supplemental_material.pdf [file supp_01138.2007_Supplemental_material.pdf]

## Supplemental material

Figure 1 Supplemental

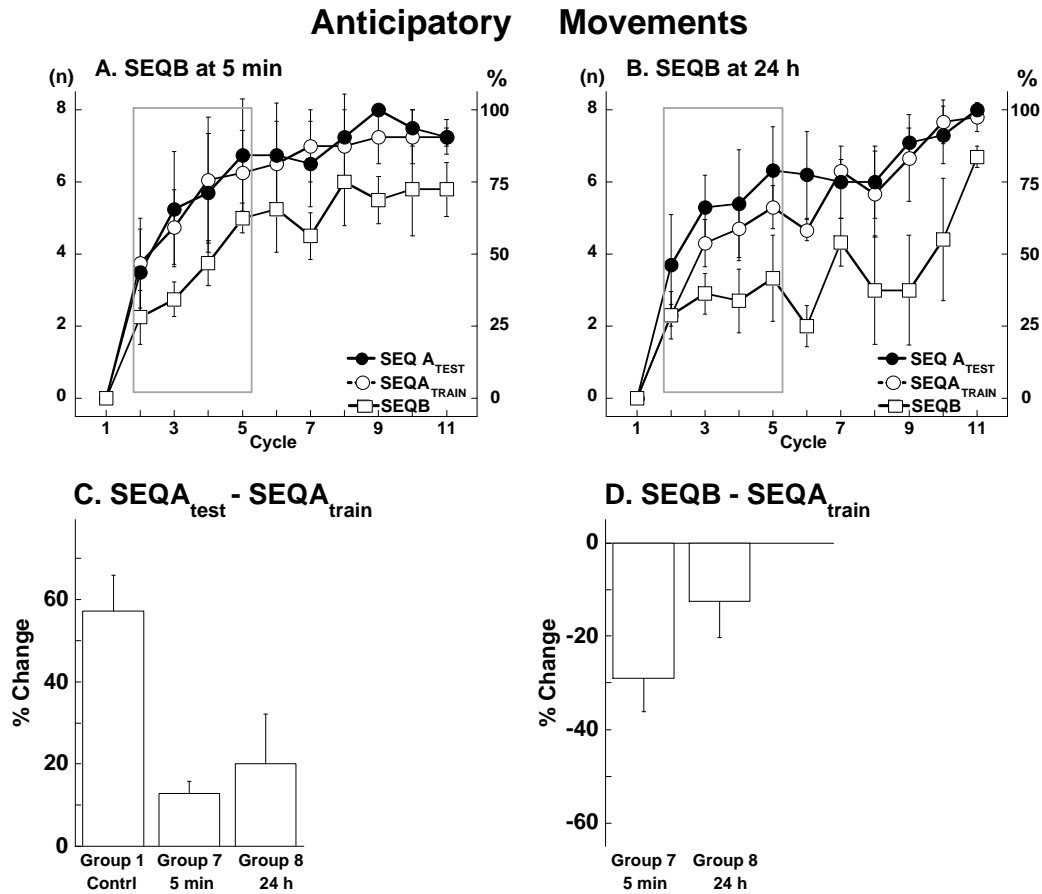

**Figure 1. Supplemental.**

A and B. Correct anticipatory movements for SEQA and B plotted as a function of movement cycles. Both Group 7 (A) and 8 (B) learned SEQA in 11 cycles and learned SEQB in 11 cycles either 5 minutes (Group 7) or 24 h later (Group 8). A. In group 7, the number of correct anticipatory movements significantly increased in SEQA<sub>train</sub>, SEQA<sub>test</sub> and SEQB across cycles ( $F(10,99) = 12.5, p < 0.0001$ ). Repeated measures ANOVA also showed a main effect for session ( $F(2,99) = 7.6, p = 0.0008$ ), without interaction. *Post-hoc* tests with Bonferroni correction showed significant difference between SEQB and SEQA<sub>train</sub> ( $p < 0.0004$ ), a borderline difference

( $p=0.02$ ) between SEQB and SEQA<sub>test</sub>, but not between SEQA<sub>train</sub> and SEQA<sub>test</sub> ( $p=0.72$ ). B. In group 8, there was a significant increase of correct anticipatory movements across cycles ( $F(10,99) = 19.5, p<0.0001$ ) and between sessions ( $F(2,99) = 9.8, p<0.0001$ ). *At post-hoc* tests there was significant difference between SEQB and SEQA<sub>train</sub> ( $p<0.0001$ ) and SEQA<sub>test</sub> ( $p=0.002$ ), but not between SEQA<sub>train</sub> and SEQA<sub>test</sub> ( $p>0.05$ ).

C. Savings at test (% improvement in cycles 2 to 5) in Groups 1 (Controls), 7 and 8. Each bar represents the mean  $\pm$  SE for each group. There were significant ( $p<0.003$ ) differences between group 1 and groups 7 and 8. D. Percent performance change between SEQB and SEQA<sub>train</sub> (Cycles 2 to 5) for groups 7 and 8. Each bar represents mean difference ( $\pm$  SE). There was no significant difference between the two groups.

## Movement Time (ms)

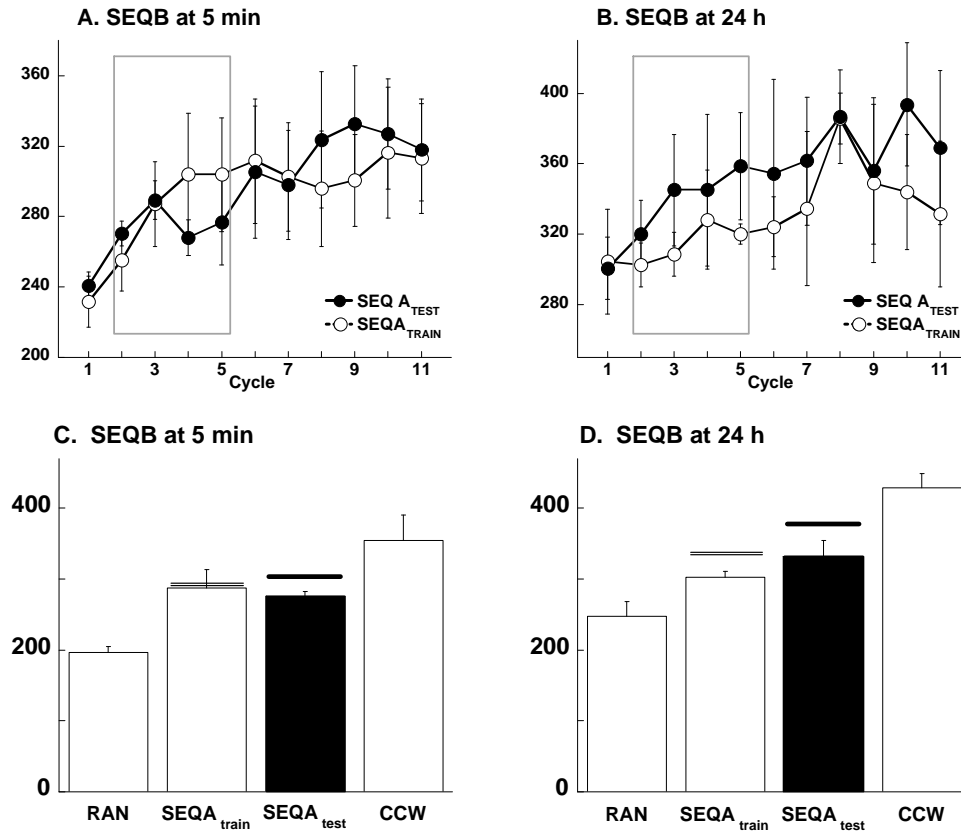

**Figure 2. Supplemental.**

Implicit learning for Group 7 (A) and Group 8 (B). Mean MTs ( $\pm$  S.E) per cycle plotted for SEQA<sub>train</sub> (empty black circles) and SEQA<sub>test</sub> (filled black circles). MT increased across cycles in both Groups during both sessions. A. Repeated measure ANOVA for Group 7 showed a main effect of cycle ( $F(10,66) = 1.9, p=0.04$ ), but not between sessions. B. For Group 8, there was an increase of MT across cycles ( $F(10,66) = 2.1, p=0.02$ ), with a difference between the two sessions ( $F(1,66) = 3.5, p=0.04$ ).

C, D. Mean MT for correct anticipatory movements in cycles 2-5 ( $\pm$  S.E) per group for RAN, CCW, SEQA<sub>train</sub> (white bars) and SEQA<sub>test</sub> (black bars). The horizontal bars in SEQA<sub>train</sub> and SEQA<sub>test</sub> bars represent the MT mean for the entire block. C. There was no significant

difference between  $SEQA_{\text{train}}$  and  $SEQA_{\text{test}}$  in Group 7. D. A borderline significant increase was found in group 8 between  $SEQA_{\text{train}}$  and  $SEQA_{\text{test}}$  ( $p=0.06$ ). The increase is comparable to the one reported for group 3.
